# Supplementary material for: The Prognostic Value of Calcium in Post-Cardiovascular Surgery Patients in the Intensive Care Unit
Source: Front Cardiovasc Med. 2021 Oct 5;8:733528. doi: 10.3389/fcvm.2021.733528 (PMC8523822; doi:10.3389/fcvm.2021.733528)
Supplement: Supplementary file 5 [file Table_5.XLSX]

## Sheet: Supplemental file 5
Supplemental file 5: Full results of univariate logistics analysis for outcomes in MIMIC III dataset.
		pre-match cohort				post-match cohort
covariate	outcome	OR	lower.ci	higher.ci	P	OR	lower.ci	higher.ci	P
GENDER	vent_group	1.05	1.03	1.07	<0.01	1.03	0.94	1.13	0.53
GENDER	hospital_interval_group	0.96	0.93	0.98	<0.01	0.94	0.87	1.01	0.08
GENDER	ICU_interval_group	0.93	0.9	0.95	<0.01	0.94	0.87	1.02	0.13
GENDER	AKD_7d	0.99	0.97	1.02	0.64	0.96	0.9	1.01	0.14
ADMISSION_TYPE	vent_group	0.88	0.87	0.9	<0.01	0.98	0.83	1.15	0.8
ADMISSION_TYPE	vent_group	0.9	0.83	0.97	0.01	0.96	0.74	1.23	0.72
ADMISSION_TYPE	hospital_interval_group	1.44	1.41	1.48	<0.01	1.29	1.11	1.48	<0.01
ADMISSION_TYPE	hospital_interval_group	1.44	1.31	1.59	<0.01	1.26	1	1.58	0.05
ADMISSION_TYPE	ICU_interval_group	1.41	1.37	1.45	<0.01	1.31	1.16	1.47	<0.01
ADMISSION_TYPE	ICU_interval_group	1.37	1.24	1.52	<0.01	1.19	0.96	1.48	0.12
ADMISSION_TYPE	AKD_7d	1.22	1.19	1.25	<0.01	1.23	1.11	1.37	<0.01
ADMISSION_TYPE	AKD_7d	1.26	1.17	1.37	<0.01	1.3	1.13	1.51	<0.01
MARITAL_STATUS	vent_group	1.04	1.01	1.08	0.02	1.01	0.89	1.15	0.85
MARITAL_STATUS	vent_group	0.97	0.95	0.99	<0.01	0.93	0.85	1.02	0.14
MARITAL_STATUS	hospital_interval_group	1.1	1.04	1.16	<0.01	1.01	0.9	1.14	0.86
MARITAL_STATUS	hospital_interval_group	1.11	1.08	1.14	<0.01	1.13	1.06	1.22	<0.01
MARITAL_STATUS	ICU_interval_group	1.21	1.14	1.27	<0.01	1.29	1.17	1.41	<0.01
MARITAL_STATUS	ICU_interval_group	1.1	1.07	1.13	<0.01	1.04	0.97	1.12	0.29
MARITAL_STATUS	AKD_7d	1.07	1.03	1.12	<0.01	1.1	1.02	1.19	0.01
MARITAL_STATUS	AKD_7d	1.05	1.03	1.07	<0.01	1.04	0.98	1.11	0.2
ETHNICITY	vent_group	0.94	0.87	1.02	0.16	0.86	0.75	0.98	0.03
ETHNICITY	vent_group	1.05	0.97	1.15	0.24	0.92	0.77	1.09	0.33
ETHNICITY	vent_group	1.1	1.02	1.18	0.01	0.88	0.71	1.08	0.22
ETHNICITY	vent_group	1.05	0.98	1.13	0.19	0.98	0.88	1.09	0.67
ETHNICITY	hospital_interval_group	1.17	1.06	1.29	<0.01	1.16	0.93	1.44	0.19
ETHNICITY	hospital_interval_group	1.09	0.97	1.22	0.15	1.15	0.91	1.46	0.23
ETHNICITY	hospital_interval_group	1.03	0.94	1.13	0.47	1.13	0.9	1.42	0.28
ETHNICITY	hospital_interval_group	1.04	0.95	1.13	0.39	1.07	0.87	1.3	0.53
ETHNICITY	ICU_interval_group	1.16	1.05	1.28	<0.01	1.25	1.01	1.54	0.04
ETHNICITY	ICU_interval_group	1.01	0.91	1.13	0.82	1.02	0.8	1.29	0.9
ETHNICITY	ICU_interval_group	1.06	0.97	1.16	0.19	1.1	0.87	1.39	0.41
ETHNICITY	ICU_interval_group	1.03	0.94	1.12	0.57	1.04	0.86	1.26	0.7
ETHNICITY	AKD_7d	1.15	1.05	1.26	<0.01	1.08	0.94	1.24	0.29
ETHNICITY	AKD_7d	1.02	0.92	1.13	0.72	0.86	0.72	1.03	0.11
ETHNICITY	AKD_7d	1.07	0.98	1.16	0.11	0.98	0.82	1.17	0.82
ETHNICITY	AKD_7d	1.06	0.98	1.15	0.18	0.98	0.87	1.1	0.71
age	vent_group	1	1	1	0.2	1	1	1	0.54
age	hospital_interval_group	1	1	1	<0.01	1	0.99	1	0.02
age	ICU_interval_group	1	1	1	<0.01	1	1	1	0.01
age	AKD_7d	1	1	1	<0.01	1	1	1	0.05
SOFA	vent_group	1.02	1.02	1.02	<0.01	1.02	1.01	1.02	<0.01
SOFA	hospital_interval_group	1.02	1.02	1.02	<0.01	1.02	1.01	1.03	<0.01
SOFA	ICU_interval_group	1.03	1.03	1.03	<0.01	1.03	1.02	1.04	<0.01
SOFA	AKD_7d	1.03	1.03	1.03	<0.01	1.03	1.02	1.04	<0.01
SPASii	vent_group	1	1	1.01	<0.01	1	1	1.01	<0.01
SPASii	hospital_interval_group	1	1	1.01	<0.01	1	1	1.01	0.01
SPASii	ICU_interval_group	1.01	1.01	1.01	<0.01	1.01	1	1.01	<0.01
SPASii	AKD_7d	1.01	1.01	1.01	<0.01	1.01	1.01	1.01	<0.01
bmi	vent_group	1	1	1	0.73	1	1	1	0.76
bmi	hospital_interval_group	1	1	1	<0.01	1	1	1	0.28
bmi	ICU_interval_group	1	1	1	<0.01	1	1	1	0.06
bmi	AKD_7d	1	1	1	<0.01	1	1	1	<0.01
heartrate_mean	vent_group	1	1	1	0.3	1	1	1	0.13
heartrate_mean	hospital_interval_group	1	1	1.01	<0.01	1	1	1.01	<0.01
heartrate_mean	ICU_interval_group	1	1	1.01	<0.01	1	1	1.01	<0.01
heartrate_mean	AKD_7d	1	1	1	<0.01	1	1	1	<0.01
sysbp_mean	vent_group	1	1	1	<0.01	1	0.99	1	0.01
sysbp_mean	hospital_interval_group	1	1	1	<0.01	1	1	1.01	0.01
sysbp_mean	ICU_interval_group	1	1	1	0.01	1	1	1	0.04
sysbp_mean	AKD_7d	1	1	1	0.06	1	1	1	0.57
diasbp_mean	vent_group	1	1	1	0.03	1	0.99	1	0.42
diasbp_mean	hospital_interval_group	1	1	1	<0.01	1	1	1.01	0.03
diasbp_mean	ICU_interval_group	1	1	1.01	<0.01	1.01	1	1.01	<0.01
diasbp_mean	AKD_7d	1	1	1	<0.01	1	0.99	1	0.03
meanbp_mean	vent_group	1	1	1	0.32	1	0.99	1	0.55
meanbp_mean	hospital_interval_group	1	1	1	<0.01	1	1	1.01	0.04
meanbp_mean	ICU_interval_group	1	1	1	<0.01	1.01	1	1.01	0.01
meanbp_mean	AKD_7d	1	1	1	<0.01	1	0.99	1	0.06
resprate_mean	vent_group	1	0.99	1	<0.01	1	0.99	1.02	0.38
resprate_mean	hospital_interval_group	1.03	1.02	1.03	<0.01	1.02	1.01	1.03	<0.01
resprate_mean	ICU_interval_group	1.03	1.03	1.03	<0.01	1.03	1.02	1.04	<0.01
resprate_mean	AKD_7d	1.02	1.01	1.02	<0.01	1.02	1.01	1.02	<0.01
tempc_mean	vent_group	1.03	1.02	1.05	<0.01	1.07	1.02	1.13	0.01
tempc_mean	hospital_interval_group	1.07	1.05	1.09	<0.01	1.07	1.02	1.11	<0.01
tempc_mean	ICU_interval_group	1.09	1.07	1.11	<0.01	1.11	1.07	1.16	<0.01
tempc_mean	AKD_7d	1.01	0.99	1.02	0.33	1.03	0.99	1.06	0.12
spo2_mean	vent_group	1.02	1.02	1.03	<0.01	1.01	1	1.03	0.06
spo2_mean	hospital_interval_group	0.98	0.98	0.99	<0.01	0.99	0.97	1.01	0.18
spo2_mean	ICU_interval_group	0.98	0.98	0.99	<0.01	0.98	0.96	1	0.07
spo2_mean	AKD_7d	0.99	0.98	0.99	<0.01	0.99	0.98	0.99	<0.01
pao2_mean	vent_group	1	1	1	<0.01	1	1	1	<0.01
pao2_mean	hospital_interval_group	1	1	1	<0.01	1	1	1	<0.01
pao2_mean	ICU_interval_group	1	1	1	<0.01	1	1	1	<0.01
pao2_mean	AKD_7d	1	1	1	<0.01	1	1	1	<0.01
paco2_mean	vent_group	1	1	1	0.96	0.99	0.99	1	0.18
paco2_mean	hospital_interval_group	1	1	1	0.11	1	1	1.01	0.62
paco2_mean	ICU_interval_group	1	1	1	<0.01	0.99	0.99	1	0.03
paco2_mean	AKD_7d	1	1	1	<0.01	1	1	1	0.9
ph_mean	vent_group	0.98	0.98	0.99	<0.01	0.98	0.98	0.98	<0.01
ph_mean	hospital_interval_group	0.99	0.98	0.99	<0.01	0.99	0.99	0.99	<0.01
ph_mean	ICU_interval_group	0.98	0.97	0.99	<0.01	0.99	0.99	0.99	<0.01
ph_mean	AKD_7d	1	0.98	1.01	0.76	1	1	1.01	0.13
elixhauser_scores	vent_group	1	1	1	<0.01	1	0.99	1	0.03
elixhauser_scores	hospital_interval_group	1.01	1.01	1.01	<0.01	1.01	1.01	1.01	<0.01
elixhauser_scores	ICU_interval_group	1.01	1.01	1.01	<0.01	1.01	1	1.01	<0.01
elixhauser_scores	AKD_7d	1.01	1.01	1.01	<0.01	1.01	1.01	1.01	<0.01
congestive_heart_failure	vent_group	0.91	0.88	0.94	<0.01	0.83	0.7	0.99	0.04
congestive_heart_failure	hospital_interval_group	1.31	1.27	1.36	<0.01	1.39	1.28	1.5	<0.01
congestive_heart_failure	ICU_interval_group	1.33	1.29	1.38	<0.01	1.27	1.06	1.52	0.01
congestive_heart_failure	AKD_7d	1.16	1.14	1.19	<0.01	1.22	1.17	1.28	<0.01
cardiac_arrhythmias	vent_group	0.91	0.88	0.93	<0.01	0.9	0.82	0.98	0.02
cardiac_arrhythmias	hospital_interval_group	1.29	1.25	1.33	<0.01	1.25	1.16	1.36	<0.01
cardiac_arrhythmias	ICU_interval_group	1.3	1.26	1.35	<0.01	1.32	1.22	1.42	<0.01
cardiac_arrhythmias	AKD_7d	1.15	1.12	1.18	<0.01	1.12	1.06	1.2	<0.01
valvular_disease	vent_group	0.94	0.89	0.99	0.03	0.91	0.78	1.05	0.2
valvular_disease	hospital_interval_group	1.25	1.18	1.32	<0.01	1.31	1.19	1.45	<0.01
valvular_disease	ICU_interval_group	1.3	1.23	1.37	<0.01	1.22	1.05	1.4	0.01
valvular_disease	AKD_7d	1.13	1.09	1.18	<0.01	1.17	1.1	1.24	<0.01
pulmonary_circulation	vent_group	0.95	0.91	1	0.07	0.87	0.74	1.02	0.09
pulmonary_circulation	hospital_interval_group	1.31	1.24	1.38	<0.01	1.32	1.16	1.49	<0.01
pulmonary_circulation	ICU_interval_group	1.29	1.22	1.36	<0.01	1.27	1.1	1.47	<0.01
pulmonary_circulation	AKD_7d	1.13	1.08	1.18	<0.01	1.14	1.05	1.24	<0.01
hypertension	vent_group	0.94	0.91	0.97	<0.01	0.94	0.86	1.03	0.18
hypertension	hospital_interval_group	1.13	1.09	1.18	<0.01	1.12	1.04	1.21	<0.01
hypertension	ICU_interval_group	1.08	1.04	1.12	<0.01	1.12	1.04	1.22	<0.01
hypertension	AKD_7d	1.22	1.19	1.25	<0.01	1.26	1.2	1.31	<0.01
paralysis	vent_group	1	0.95	1.05	0.94	0.78	0.52	1.18	0.24
paralysis	hospital_interval_group	1.27	1.2	1.35	<0.01	1.43	1.29	1.59	<0.01
paralysis	ICU_interval_group	1.28	1.2	1.36	<0.01	1.44	1.24	1.66	<0.01
paralysis	AKD_7d	1.05	1	1.11	0.07	0.77	0.53	1.12	0.17
chronic_pulmonary	vent_group	1.05	1.02	1.07	<0.01	1.09	1.02	1.17	0.01
chronic_pulmonary	hospital_interval_group	1.06	1.02	1.09	<0.01	1.02	0.95	1.09	0.56
chronic_pulmonary	ICU_interval_group	1.06	1.03	1.09	<0.01	1.07	1	1.15	0.04
chronic_pulmonary	AKD_7d	1	0.97	1.03	0.93	1.01	0.96	1.07	0.62
renal_failure	vent_group	0.93	0.91	0.96	<0.01	0.85	0.72	0.99	0.04
renal_failure	hospital_interval_group	1.14	1.1	1.18	<0.01	1.19	1.07	1.31	<0.01
renal_failure	ICU_interval_group	1.09	1.05	1.13	<0.01	1.04	0.91	1.19	0.54
renal_failure	AKD_7d	1.24	1.22	1.27	<0.01	1.29	1.24	1.34	<0.01
liver_disease	vent_group	0.98	0.94	1.01	0.2	0.95	0.82	1.09	0.45
liver_disease	hospital_interval_group	1.18	1.13	1.23	<0.01	1.16	1.05	1.28	<0.01
liver_disease	ICU_interval_group	1.14	1.09	1.2	<0.01	1.1	0.97	1.25	0.14
liver_disease	AKD_7d	1.11	1.07	1.15	<0.01	1.05	0.92	1.2	0.49
rheumatoid_arthritis	vent_group	0.94	0.88	1	0.04	0.95	0.8	1.13	0.57
rheumatoid_arthritis	hospital_interval_group	1.07	1	1.15	0.07	1.09	0.93	1.28	0.27
rheumatoid_arthritis	ICU_interval_group	1.06	0.98	1.14	0.12	1.19	1.04	1.35	0.01
rheumatoid_arthritis	AKD_7d	1.08	1.02	1.14	0.01	1.14	1.06	1.22	<0.01
coagulopathy	vent_group	0.99	0.97	1.01	0.37	0.92	0.8	1.05	0.23
coagulopathy	hospital_interval_group	1.23	1.19	1.27	<0.01	1.3	1.2	1.41	<0.01
coagulopathy	ICU_interval_group	1.25	1.21	1.29	<0.01	1.2	1.06	1.36	<0.01
coagulopathy	AKD_7d	1.16	1.13	1.19	<0.01	1.18	1.11	1.26	<0.01
obesity	vent_group	1.1	1.07	1.13	<0.01	1.19	1.13	1.25	<0.01
obesity	hospital_interval_group	0.95	0.91	0.99	0.01	0.86	0.8	0.93	<0.01
obesity	ICU_interval_group	0.95	0.91	0.99	0.01	0.88	0.81	0.95	<0.01
obesity	AKD_7d	0.95	0.91	0.98	<0.01	0.93	0.87	1.01	0.07
aniongap_mean	vent_group	0.99	0.99	0.99	<0.01	1	0.99	1.01	0.75
aniongap_mean	hospital_interval_group	1.03	1.02	1.03	<0.01	1.01	1	1.03	<0.01
aniongap_mean	ICU_interval_group	1.04	1.03	1.04	<0.01	1.03	1.02	1.04	<0.01
aniongap_mean	AKD_7d	1.03	1.03	1.03	<0.01	1.02	1.02	1.03	<0.01
bicarbonate_mean	vent_group	1	1	1	0.18	0.99	0.97	1	0.04
bicarbonate_mean	hospital_interval_group	0.99	0.99	0.99	<0.01	1	0.99	1.01	0.84
bicarbonate_mean	ICU_interval_group	0.99	0.98	0.99	<0.01	0.98	0.97	0.99	<0.01
bicarbonate_mean	AKD_7d	0.98	0.98	0.98	<0.01	0.99	0.98	1	<0.01
creatinine_mean	vent_group	0.97	0.96	0.98	<0.01	0.97	0.95	0.99	<0.01
creatinine_mean	hospital_interval_group	1.04	1.03	1.05	<0.01	1.04	1.02	1.05	<0.01
creatinine_mean	ICU_interval_group	1.04	1.03	1.05	<0.01	1.04	1.02	1.06	<0.01
creatinine_mean	AKD_7d	1.07	1.06	1.08	<0.01	1.06	1.05	1.07	<0.01
chloride_mean	vent_group	1.01	1.01	1.01	<0.01	1.01	1.01	1.02	<0.01
chloride_mean	hospital_interval_group	0.99	0.99	0.99	<0.01	0.99	0.98	0.99	<0.01
chloride_mean	ICU_interval_group	0.99	0.99	1	<0.01	1	0.99	1	0.15
chloride_mean	AKD_7d	1	1	1	<0.01	1	0.99	1	0.04
glucose_mean	vent_group	1	1	1	0.21	1	1	1	0.62
glucose_mean	hospital_interval_group	1	1	1	<0.01	1	1	1	0.28
glucose_mean	ICU_interval_group	1	1	1	<0.01	1	1	1	0.05
glucose_mean	AKD_7d	1	1	1	<0.01	1	1	1	<0.01
hematocrit_mean	vent_group	1	1	1	0.05	1	1	1.01	0.36
hematocrit_mean	hospital_interval_group	1	1	1	0.55	1	0.99	1	0.29
hematocrit_mean	ICU_interval_group	1.01	1.01	1.01	<0.01	1.01	1.01	1.02	<0.01
hematocrit_mean	AKD_7d	1	1	1	0.59	1	1	1.01	0.49
hemoglobin_mean	vent_group	0.99	0.99	1	0.05	1.01	0.99	1.03	0.45
hemoglobin_mean	hospital_interval_group	1	0.99	1.01	0.94	0.99	0.97	1.01	0.37
hemoglobin_mean	ICU_interval_group	1.03	1.02	1.03	<0.01	1.03	1.01	1.05	<0.01
hemoglobin_mean	AKD_7d	0.99	0.99	1	0.05	1	0.99	1.02	0.93
lactate_mean	vent_group	1.01	1.01	1.02	<0.01	1.02	1.01	1.03	<0.01
lactate_mean	hospital_interval_group	1.01	1	1.02	<0.01	0.99	0.98	1.01	0.41
lactate_mean	ICU_interval_group	1.02	1.01	1.03	<0.01	1.01	0.99	1.03	0.48
lactate_mean	AKD_7d	1.03	1.02	1.03	<0.01	1.02	1.01	1.03	<0.01
platelet_mean	vent_group	1	1	1	<0.01	1	1	1	0.54
platelet_mean	hospital_interval_group	1	1	1	<0.01	1	1	1	0.09
platelet_mean	ICU_interval_group	1	1	1	<0.01	1	1	1	<0.01
platelet_mean	AKD_7d	1	1	1	0.08	1	1	1	0.89
potassium_mean	vent_group	1.07	1.05	1.09	<0.01	1.14	1.06	1.22	<0.01
potassium_mean	hospital_interval_group	0.93	0.91	0.95	<0.01	0.89	0.85	0.94	<0.01
potassium_mean	ICU_interval_group	0.92	0.9	0.94	<0.01	0.94	0.88	1.01	0.09
potassium_mean	AKD_7d	1.06	1.04	1.08	<0.01	1.05	0.99	1.11	0.08
ptt_mean	vent_group	1	1	1	0.17	1	1	1	0.96
ptt_mean	hospital_interval_group	1	1	1	<0.01	1	1	1	0.07
ptt_mean	ICU_interval_group	1	1	1	<0.01	1	1	1	0.01
ptt_mean	AKD_7d	1	1	1	<0.01	1	1	1	<0.01
inr_mean	vent_group	0.96	0.94	0.98	<0.01	0.99	0.95	1.03	0.6
inr_mean	hospital_interval_group	1.06	1.03	1.08	<0.01	1.03	1.01	1.06	0.02
inr_mean	ICU_interval_group	1.06	1.04	1.09	<0.01	1.06	1.03	1.08	<0.01
inr_mean	AKD_7d	1.08	1.06	1.1	<0.01	1.05	1.02	1.08	<0.01
pt_mean	vent_group	1	0.99	1	<0.01	1	0.99	1.01	0.81
pt_mean	hospital_interval_group	1.01	1.01	1.01	<0.01	1.01	1	1.01	0.04
pt_mean	ICU_interval_group	1.01	1.01	1.01	<0.01	1.01	1.01	1.02	<0.01
pt_mean	AKD_7d	1.01	1.01	1.01	<0.01	1.01	1	1.01	<0.01
sodium_mean	vent_group	1	1	1.01	0.08	1	0.99	1.01	0.7
sodium_mean	hospital_interval_group	1	1	1.01	0.01	1	1	1.01	0.34
sodium_mean	ICU_interval_group	1.01	1.01	1.02	<0.01	1.01	1	1.02	0.01
sodium_mean	AKD_7d	1	1	1	0.13	1.01	1	1.01	0.03
bun_mean	vent_group	1	1	1	<0.01	1	1	1	<0.01
bun_mean	hospital_interval_group	1	1	1	<0.01	1	1	1	<0.01
bun_mean	ICU_interval_group	1	1	1	<0.01	1	1	1	<0.01
bun_mean	AKD_7d	1.01	1	1.01	<0.01	1	1	1.01	<0.01
wbc_mean	vent_group	1	1	1	0.18	1.01	1	1.01	0.01
wbc_mean	hospital_interval_group	1	1	1	0.49	1	1	1	0.6
wbc_mean	ICU_interval_group	1	1	1	0.27	1	1	1.01	0.26
wbc_mean	AKD_7d	1	1	1	<0.01	1	1	1	0.47
vasopressor	vent_group	1.28	1.25	1.3	<0.01	1.32	1.21	1.45	<0.01
vasopressor	hospital_interval_group	0.84	0.82	0.87	<0.01	0.83	0.78	0.89	<0.01
vasopressor	ICU_interval_group	0.88	0.86	0.9	<0.01	0.84	0.78	0.89	<0.01
vasopressor	AKD_7d	0.98	0.95	1	0.02	0.99	0.92	1.06	0.75
crrt	vent_group	0.94	0.89	0.99	0.01	0.91	0.79	1.04	0.15
crrt	hospital_interval_group	1.2	1.14	1.27	<0.01	1.15	1.02	1.29	0.02
crrt	ICU_interval_group	1.14	1.08	1.21	<0.01	1.09	0.96	1.24	0.18
crrt	AKD_7d	1.28	1.25	1.3	<0.01	1.28	1.22	1.33	<0.01
calcium_sup	vent_group	1.26	1.23	1.29	<0.01	1.37	1.24	1.52	<0.01
calcium_sup	hospital_interval_group	0.99	0.97	1.02	0.72	0.98	0.9	1.08	0.73
calcium_sup	ICU_interval_group	1.1	1.07	1.13	<0.01	1.17	1.08	1.27	<0.01
calcium_sup	AKD_7d	1.03	1.01	1.06	0.02	1	0.94	1.08	0.9
diabetes	vent_group	1.01	0.99	1.03	0.26	0.93	0.83	1.04	0.2
diabetes	hospital_interval_group	1.01	0.98	1.03	0.7	1.01	0.93	1.1	0.75
diabetes	ICU_interval_group	0.98	0.95	1	0.08	0.96	0.88	1.04	0.32
diabetes	AKD_7d	1.02	1	1.05	0.06	0.99	0.92	1.07	0.86
cancer	vent_group	0.9	0.87	0.94	<0.01	0.93	0.81	1.06	0.26
cancer	hospital_interval_group	1.08	1.03	1.13	<0.01	1	0.88	1.13	1
cancer	ICU_interval_group	1.1	1.05	1.16	<0.01	1.1	0.97	1.25	0.12
cancer	AKD_7d	1.05	1.01	1.09	0.01	1.09	1	1.18	0.04
fcalcium_risk_group	vent_group	0.89	0.83	0.97	<0.01	0.75	0.64	0.89	<0.01
fcalcium_risk_group	vent_group	0.94	0.92	0.95	<0.01	0.94	0.92	0.96	<0.01
fcalcium_risk_group	vent_group	0.97	0.92	1.01	0.12	0.96	0.91	1.01	0.09
fcalcium_risk_group	hospital_interval_group	1.44	1.33	1.56	<0.01	1.37	1.23	1.52	<0.01
fcalcium_risk_group	hospital_interval_group	1.15	1.12	1.18	<0.01	1.09	1.06	1.12	<0.01
fcalcium_risk_group	hospital_interval_group	1.03	0.97	1.09	0.37	1.01	0.95	1.08	0.76
fcalcium_risk_group	ICU_interval_group	1.42	1.3	1.54	<0.01	1.21	1.04	1.42	0.02
fcalcium_risk_group	ICU_interval_group	1.18	1.15	1.22	<0.01	1.12	1.09	1.15	<0.01
fcalcium_risk_group	ICU_interval_group	1.02	0.96	1.08	0.61	1	0.94	1.06	0.94
fcalcium_risk_group	AKD_7d	1.25	1.18	1.32	<0.01	1.14	1	1.31	0.06
fcalcium_risk_group	AKD_7d	1.07	1.05	1.1	<0.01	1.05	1.02	1.08	<0.01
fcalcium_risk_group	AKD_7d	1.03	0.97	1.09	0.35	1.01	0.96	1.07	0.65
calcium_risk_group	vent_group	1.01	0.98	1.04	0.59	0.85	0.73	0.98	0.03
calcium_risk_group	vent_group	1.03	1.01	1.06	<0.01	1.01	0.97	1.06	0.56
calcium_risk_group	vent_group	0.95	0.85	1.07	0.42	0.86	0.72	1.02	0.09
calcium_risk_group	hospital_interval_group	1.14	1.1	1.18	<0.01	1.25	1.13	1.37	<0.01
calcium_risk_group	hospital_interval_group	1.02	0.99	1.05	0.27	1.03	0.98	1.1	0.24
calcium_risk_group	hospital_interval_group	1.18	1.03	1.35	0.02	1.26	1.08	1.48	<0.01
calcium_risk_group	ICU_interval_group	1.14	1.1	1.19	<0.01	1.14	1	1.3	0.05
calcium_risk_group	ICU_interval_group	0.98	0.95	1.01	0.13	1	0.95	1.06	0.88
calcium_risk_group	ICU_interval_group	1.22	1.08	1.39	<0.01	1.36	1.16	1.58	<0.01
calcium_risk_group	AKD_7d	1.05	1.02	1.09	<0.01	1.04	0.93	1.18	0.48
calcium_risk_group	AKD_7d	0.96	0.94	0.99	<0.01	0.99	0.94	1.03	0.59
calcium_risk_group	AKD_7d	1.23	1.16	1.3	<0.01	1.29	1.24	1.34	<0.01
